# Supplementary material for: Catalytic polymerization of naphthalene by HF/BF3 super acid: an ab initio density functional theory study
Source: Royal Society of Chemistry journal article supplement (doi:10.1039/c8cp02777c), 2018-01-01
Supplement: c8cp02777c1.pdf [file c8cp02777c1.pdf]

**Catalytic Polymerization of Naphthalene by HF/BF<sub>3</sub> Super Acid:**

**An Ab Initio Density Functional Theory Study**

*Po-Yu Yang,<sup>a</sup> Hsing-Yin Chen,<sup>b</sup> Shin-Pon Ju,<sup>a,b\*</sup> Chia-Lin Chang<sup>c</sup> and Gao-Shee Le<sup>c</sup>*

*<sup>a</sup> Department of Mechanical and Electro-Mechanical Engineering, National Sun Yat-sen University,  
Kaohsiung, Taiwan*

*<sup>b</sup> Department of Medicinal and Applied Chemistry, Kaohsiung Medical University, Kaohsiung, Taiwan*

*<sup>c</sup> Refining & Manufacturing Research Institute, CPC Corporation, Chiayi City, Taiwan*

*\*Corresponding Author: [jushin-pon@mail.nsysu.edu.tw](mailto:jushin-pon@mail.nsysu.edu.tw)*

**Supporting Information**

## Obtaining Transition State Structure

For verifying the TS structures by the simple scanning approach are identical to those by the synchronous transit-guided quasi-Newton (STQN) method [1], the benchmark test has been conducted for the TS structure of naphthalene protonation. The TS structures obtained by these two methods are identical, revealing the simple scanning approach is both efficient and reliable for the TS search in this study. Intrinsic reaction coordinate (IRC) calculations [2] were performed for each TS to confirm that they connect to the corresponding intermediates. However, the IRC calculations for the transition state could sometimes be difficult to reach the convergence criterion and show relatively lower efficiency. In this case, we used the visualization program GaussView [3] to change the TS structure a little bit along the imaginary vibrational vector and reoptimized the geometry to obtain reactant and product. The connectivity between each TS's reactant and product have been further confirmed by using GaussView. The reactant and product of protonation, electrophilic addition and deprotonation in activation stage have been both calculated by IRC and our method. The results show that the structures of intermediates from IRC are identical with that from the method used in the current study.

- [1] P. Chunyang and B. S. H., "Combining Synchronous Transit and Quasi-Newton Methods to Find Transition States," *Israel Journal of Chemistry*, vol. 33, pp. 449-454, 1993.
- [2] K. Fukui, "Formulation of the reaction coordinate," *The Journal of Physical Chemistry*, vol. 74, pp. 4161-4163, 1970.
- [3] T. A. K. Roy Dennington, John M. Millam, "GaussView, Version 5," ed: Semichem Inc., Shawnee Mission, KS, 2009.

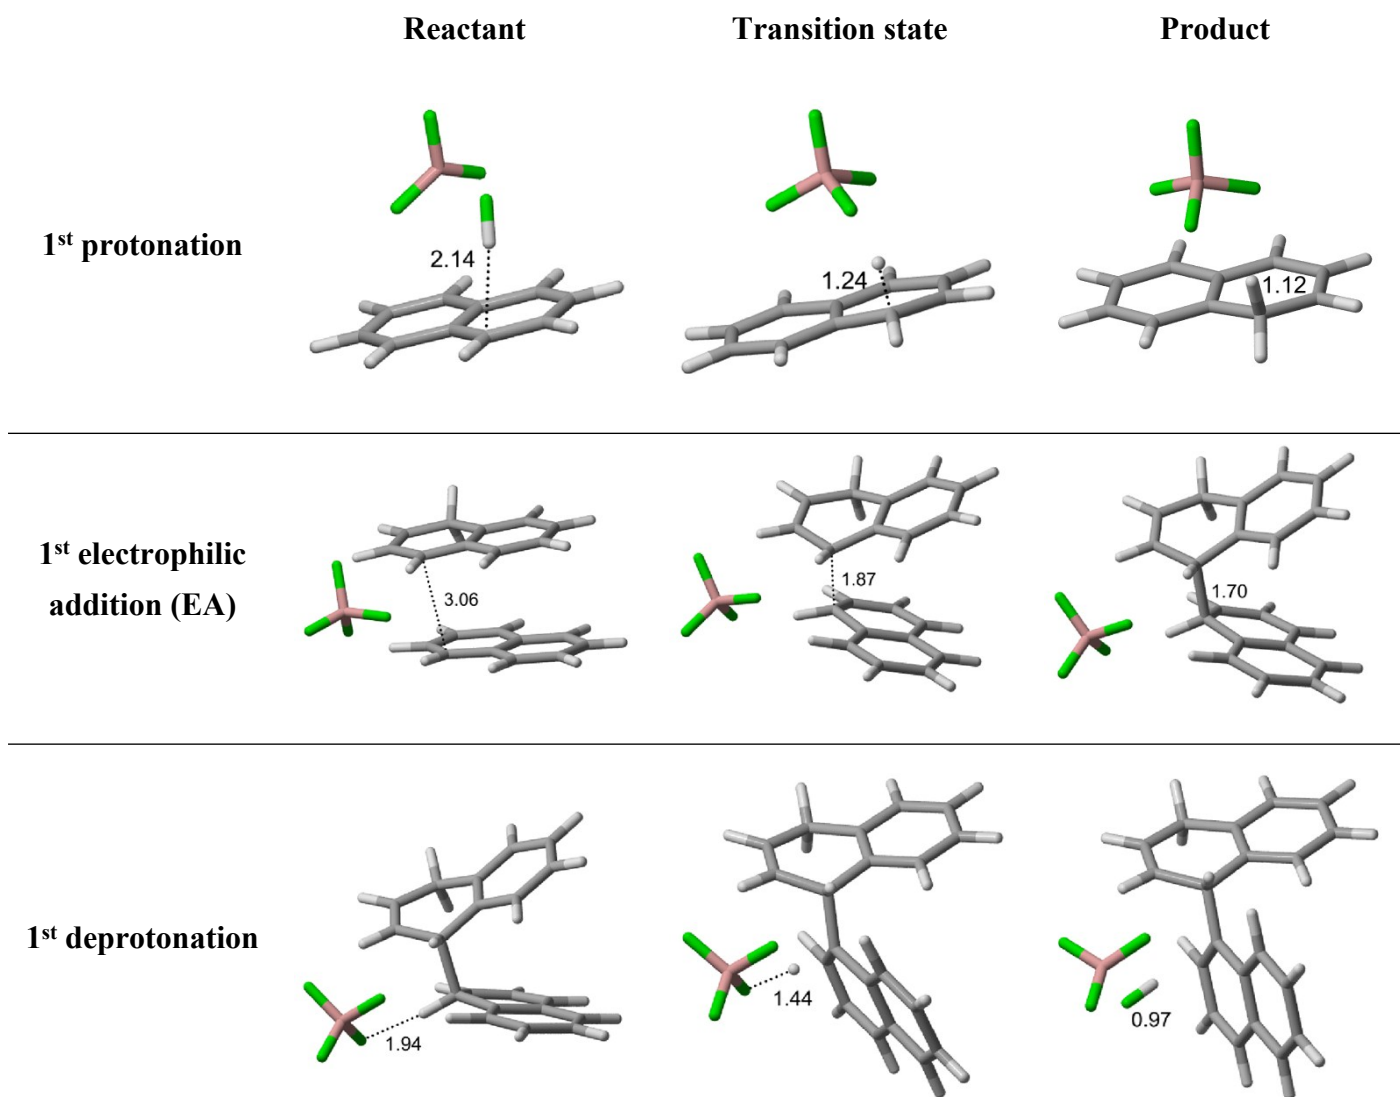

**Supplementary Figure S1:** All molecular structures of reactants, transition states and products in activation stage.

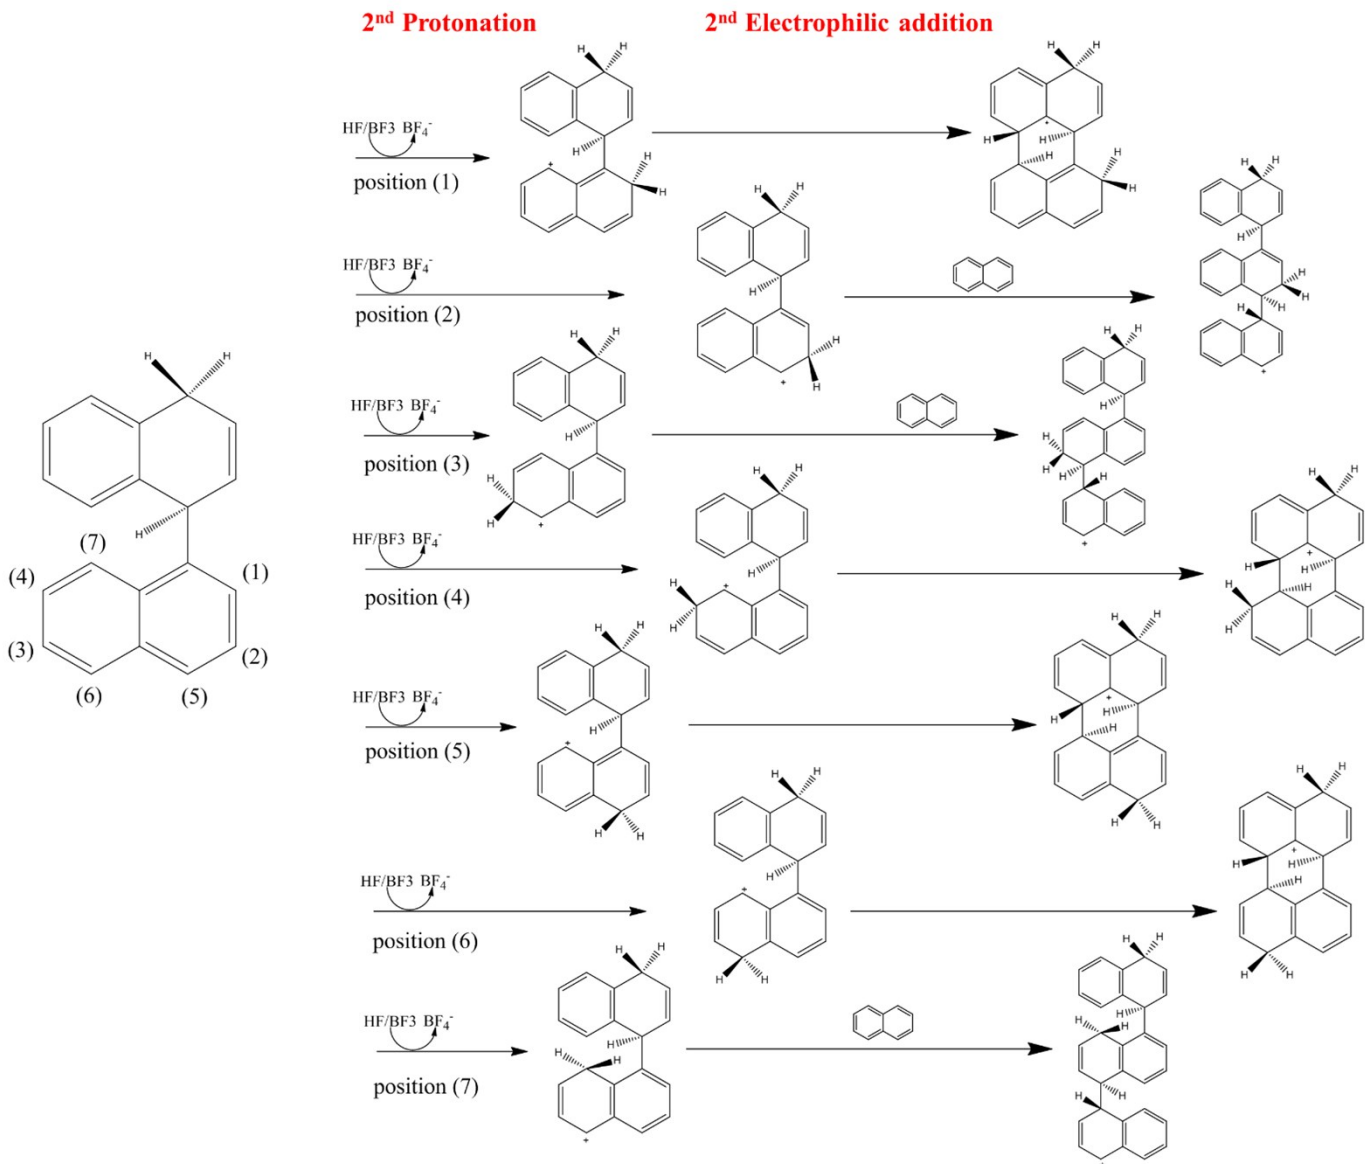

**Supplementary Figure S2:** Second protonation products at seven different additional sites on C<sub>10</sub>H<sub>9</sub>(C<sub>10</sub>H<sub>7</sub>) and which follow the second electrophilic addition pathways.

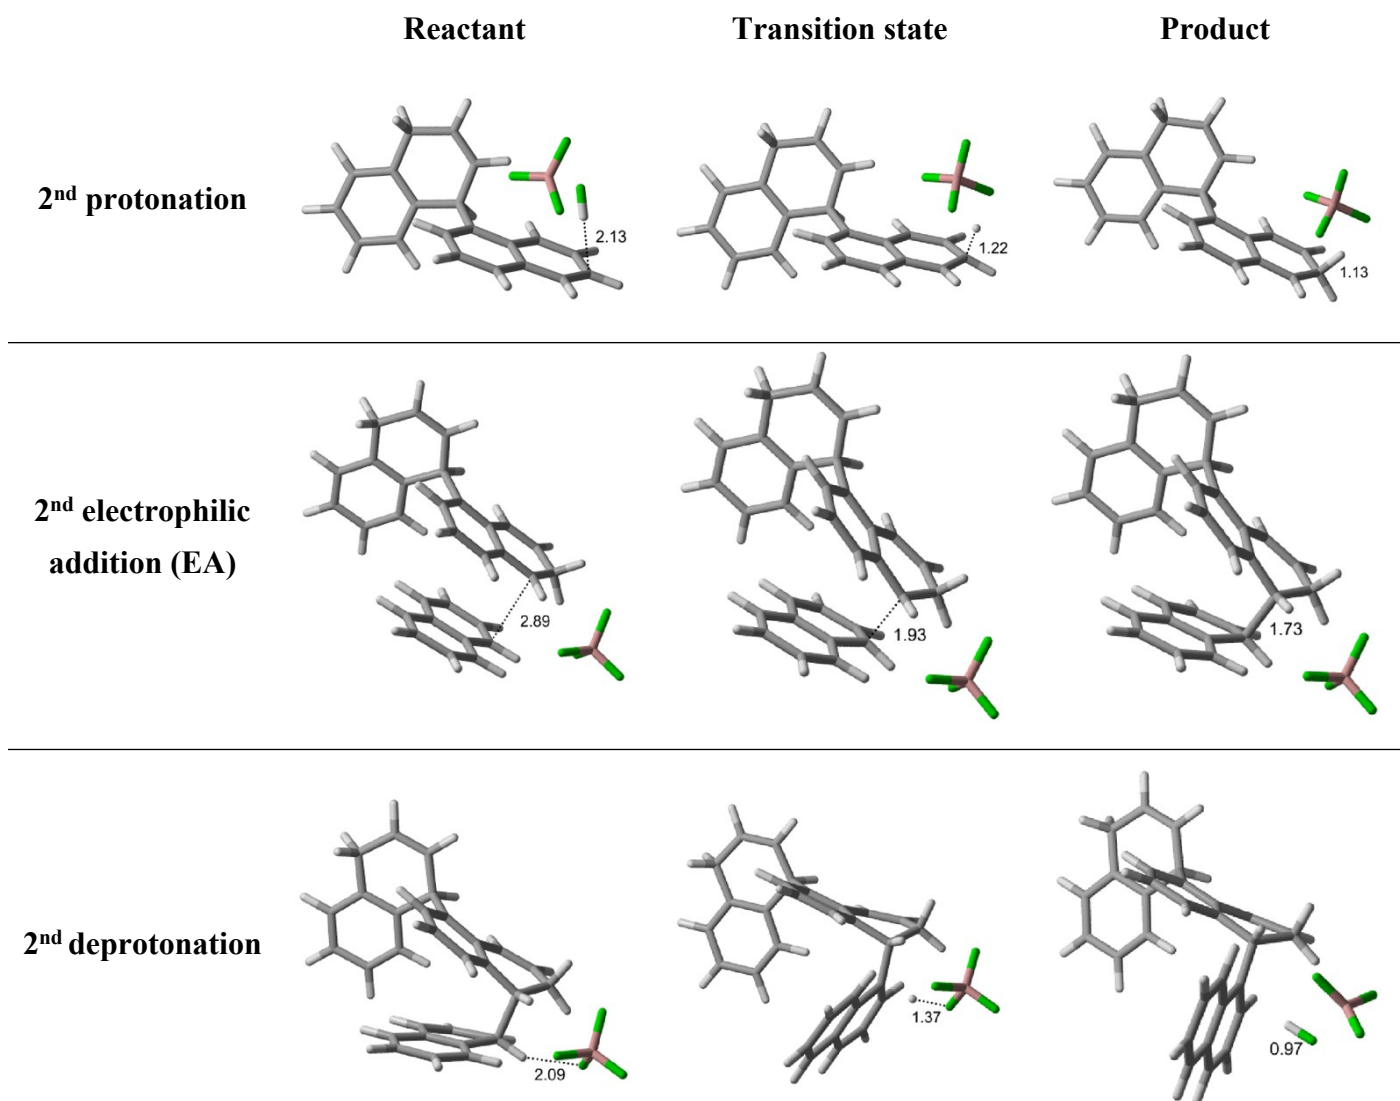

**Supplementary Figure S3:** All molecular structures of reactants, transition states and products in chain elongation pathway A.

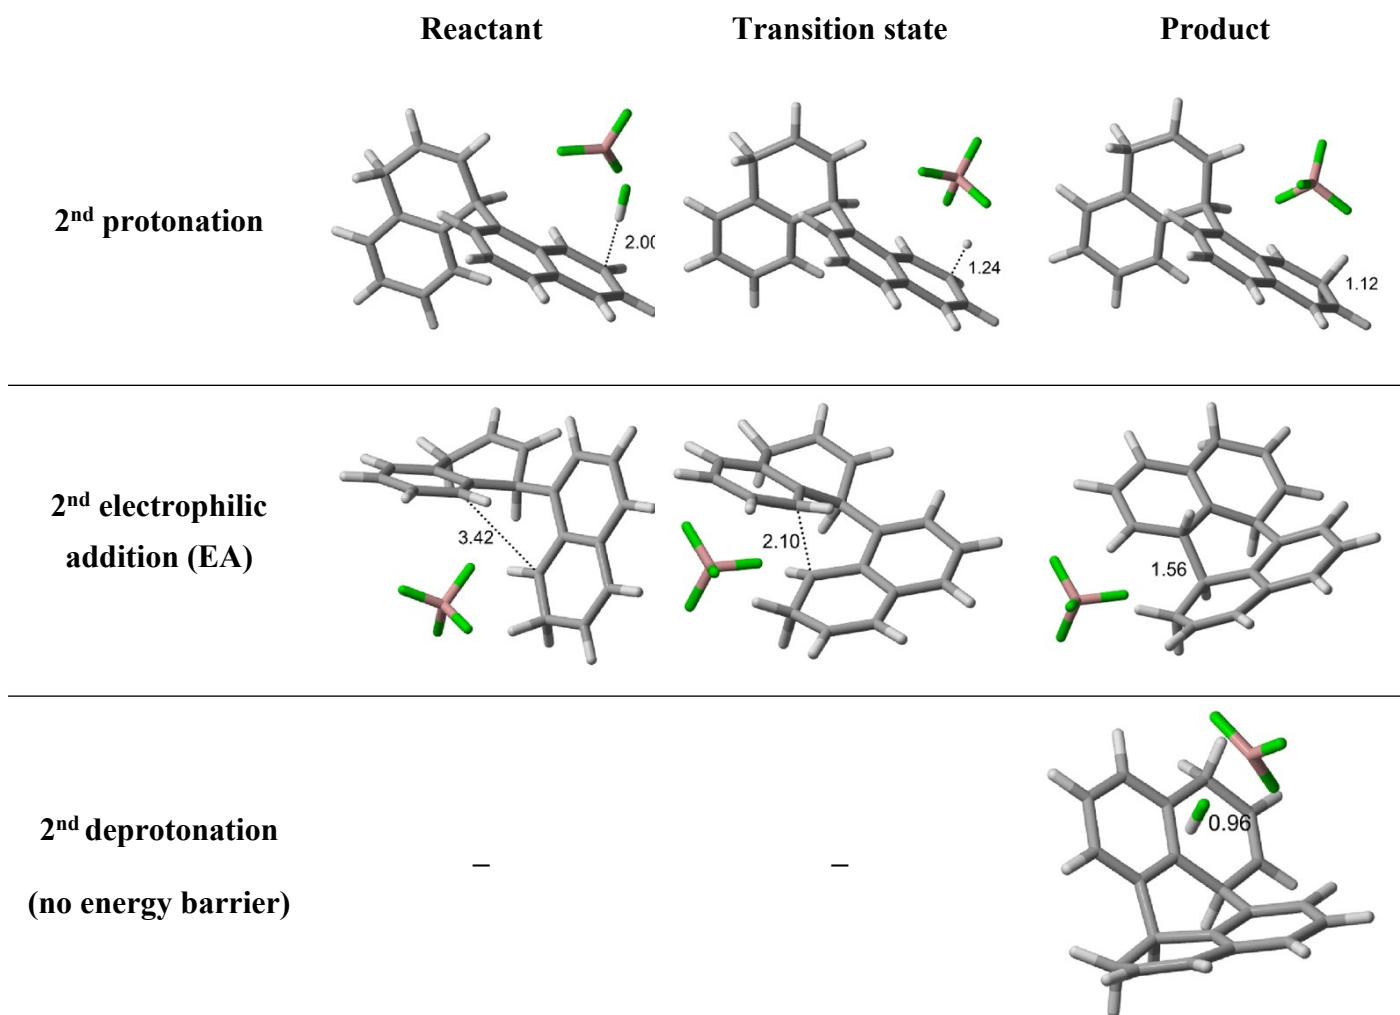

**Supplementary Figure S4:** All molecular structures of reactants, transition states and products in intramolecular cyclization pathway B.

**Supplementary Table S1:** Unscaled imaginary vibrational frequency of all transition state structure of naphthalene polymerization. Geometric optimization and vibrational frequency were calculated in M06-2X/6-31G(d) level.

| <b>Transition State</b> | <b>Unscaled Imaginary Frequency (cm<sup>-1</sup>)</b> |
|-------------------------|-------------------------------------------------------|
| TS-AB                   | -490.8984                                             |
| TS-BC                   | -212.7717                                             |
| TS-CD                   | -320.7164                                             |
| TS-DE                   | -293.0561                                             |
| TS-EF                   | -222.9397                                             |
| TS-FG                   | -597.7080                                             |
| TS-DH                   | -448.3683                                             |
| TS-HI                   | -265.1043                                             |

**Supplementary Appendix:** The geometries of intermediates and transition states are shown in XYZ file format, the unit is Å

|    |                                 |          |          |    |                           |          |          |    |                                |          |          |
|----|---------------------------------|----------|----------|----|---------------------------|----------|----------|----|--------------------------------|----------|----------|
| 24 |                                 |          |          | 24 |                           |          |          | 24 |                                |          |          |
|    | <b>1st protonation reactant</b> |          |          |    | <b>1st protonation TS</b> |          |          |    | <b>1st protonation product</b> |          |          |
| B  | 2.17826                         | -0.54092 | -0.02635 | B  | -1.89301                  | -0.87652 | -0.26503 | B  | -1.95174                       | -0.46237 | -0.25368 |
| F  | 1.27027                         | -1.27233 | -0.65784 | F  | -0.78607                  | -1.69330 | -0.38110 | F  | -1.03785                       | -1.40955 | -0.72112 |
| F  | 1.96750                         | -0.19808 | 1.23767  | F  | -1.73515                  | 0.28952  | -1.00514 | F  | -1.54063                       | 0.82151  | -0.67494 |
| F  | 3.41002                         | -0.48537 | -0.51053 | F  | -3.06988                  | -1.52102 | -0.54248 | F  | -3.22970                       | -0.73000 | -0.71188 |
| F  | 1.62157                         | 1.22387  | -0.84562 | F  | -1.95460                  | -0.43257 | 1.14576  | F  | -1.93801                       | -0.46633 | 1.16561  |
| H  | 0.68557                         | 1.35726  | -0.93864 | H  | -0.96620                  | 0.56614  | 1.28063  | H  | -0.76009                       | 1.06326  | 1.51970  |
| C  | -0.74399                        | 2.46777  | 0.89859  | C  | -0.04113                  | 2.66210  | -0.52425 | C  | 0.79415                        | 2.67910  | -0.57906 |
| C  | -0.74420                        | 1.24345  | 1.51659  | C  | 0.77098                   | 1.75273  | -1.18856 | C  | 1.29922                        | 1.51616  | -1.18525 |
| C  | -1.09986                        | 0.06525  | 0.80717  | C  | 1.30798                   | 0.60411  | -0.56662 | C  | 1.40305                        | 0.27952  | -0.53032 |
| C  | -1.45808                        | 0.16586  | -0.56653 | C  | 1.01338                   | 0.36347  | 0.80140  | C  | 0.95937                        | 0.17754  | 0.81531  |
| C  | -1.44263                        | 1.44705  | -1.18741 | C  | 0.05871                   | 1.23878  | 1.46617  | C  | 0.31749                        | 1.34907  | 1.45591  |
| C  | -1.09590                        | 2.57225  | -0.47190 | C  | -0.36707                  | 2.42511  | 0.80116  | C  | 0.33494                        | 2.60457  | 0.70572  |
| H  | -0.79341                        | -1.28496 | 2.46741  | H  | 2.35053                   | -0.10927 | -2.32372 | H  | 2.26492                        | -0.75505 | -2.22632 |
| H  | -0.46186                        | 3.35938  | 1.44833  | H  | -0.42658                  | 3.53266  | -1.04128 | H  | 0.75704                        | 3.60661  | -1.13737 |
| H  | -0.45420                        | 1.15321  | 2.55974  | H  | 1.00778                   | 1.92101  | -2.23685 | H  | 1.63397                        | 1.57122  | -2.21940 |
| C  | -1.08306                        | -1.21389 | 1.42253  | C  | 2.14286                   | -0.29725 | -1.27440 | C  | 1.93985                        | -0.85222 | -1.19467 |
| C  | -1.79939                        | -1.01248 | -1.28096 | C  | 1.56017                   | -0.76361 | 1.43590  | C  | 1.05269                        | -1.04915 | 1.46715  |
| H  | -1.71189                        | 1.52322  | -2.23773 | H  | 0.07010                   | 1.25221  | 2.55764  | H  | 0.62037                        | 1.49048  | 2.50125  |
| H  | -1.08547                        | 3.54272  | -0.95816 | H  | -1.01920                  | 3.11144  | 1.33387  | H  | -0.07944                       | 3.48530  | 1.18899  |
| C  | -1.78091                        | -2.23241 | -0.65744 | C  | 2.37652                   | -1.61822 | 0.72928  | C  | 1.58230                        | -2.14162 | 0.80132  |
| C  | -1.41595                        | -2.33468 | 0.70814  | C  | 2.66634                   | -1.39135 | -0.63500 | C  | 2.02981                        | -2.04951 | -0.53088 |
| H  | -2.07175                        | -0.92883 | -2.32974 | H  | 1.32719                   | -0.95488 | 2.47905  | H  | 0.68554                        | -1.14809 | 2.48346  |
| H  | -2.04127                        | -3.12953 | -1.21022 | H  | 2.80036                   | -2.48661 | 1.22391  | H  | 1.64535                        | -3.09641 | 1.31442  |
| H  | -1.39743                        | -3.30976 | 1.18492  | H  | 3.29992                   | -2.08891 | -1.17202 | H  | 2.42956                        | -2.92693 | -1.02677 |



| 42                     |          |          |          | 42               |          |          |          | 42                    |          |          |          |
|------------------------|----------|----------|----------|------------------|----------|----------|----------|-----------------------|----------|----------|----------|
| <b>1st EA reactant</b> |          |          |          | <b>1st EA TS</b> |          |          |          | <b>1st EA product</b> |          |          |          |
| H                      | -4.12631 | 1.22020  | -1.85453 | H                | 5.01599  | -1.55587 | -1.40729 | H                     | 5.13403  | -1.47429 | -1.32650 |
| C                      | -0.53295 | 3.23303  | 0.33053  | C                | 1.08085  | -3.18061 | 0.51592  | C                     | 1.20850  | -3.19348 | 0.52774  |
| H                      | -0.70823 | 4.21799  | -0.13227 | H                | 1.47699  | -4.18266 | 0.31865  | H                     | 1.62165  | -4.18226 | 0.29861  |
| C                      | 0.92146  | 3.08957  | 0.57828  | C                | -0.39241 | -3.12942 | 0.24024  | C                     | -0.26651 | -3.16519 | 0.24322  |
| H                      | 1.39675  | 3.86455  | 1.17408  | H                | -0.97452 | -4.02404 | 0.44299  | H                     | -0.83162 | -4.07318 | 0.43591  |
| C                      | 1.65210  | 2.05254  | 0.09668  | C                | -0.99559 | -2.02327 | -0.20896 | C                     | -0.88883 | -2.07664 | -0.21212 |
| H                      | 2.71194  | 1.93306  | 0.28560  | H                | -2.06587 | -1.98209 | -0.38859 | H                     | -1.95907 | -2.06657 | -0.40019 |
| C                      | 1.00236  | 1.05600  | -0.67663 | C                | -0.20751 | -0.80582 | -0.49190 | C                     | -0.14117 | -0.81069 | -0.47921 |
| H                      | 1.59538  | 0.22668  | -1.05735 | H                | -0.70341 | -0.14077 | -1.19708 | H                     | -0.61973 | -0.25625 | -1.28815 |
| C                      | -0.36451 | 1.11623  | -1.01229 | C                | 1.23864  | -1.00068 | -0.73832 | C                     | 1.33022  | -0.99668 | -0.71610 |
| C                      | -1.16694 | 2.16805  | -0.50378 | C                | 1.87466  | -2.15162 | -0.24837 | C                     | 1.98144  | -2.13453 | -0.22257 |
| H                      | -3.15682 | 2.98308  | -0.42833 | H                | 3.72487  | -3.23370 | -0.12622 | H                     | 3.84895  | -3.18267 | -0.07838 |
| C                      | -2.52492 | 2.18829  | -0.81450 | C                | 3.23507  | -2.33582 | -0.49451 | C                     | 3.34976  | -2.29115 | -0.45056 |
| C                      | -3.06618 | 1.19395  | -1.62043 | C                | 3.95918  | -1.39446 | -1.21813 | C                     | 4.07121  | -1.33397 | -1.15484 |
| H                      | -2.72280 | -0.60893 | -2.76344 | H                | 3.88510  | 0.47611  | -2.29051 | H                     | 3.97348  | 0.53954  | -2.21923 |
| C                      | -2.27320 | 0.15822  | -2.14304 | C                | 3.32623  | -0.25463 | -1.71499 | C                     | 3.42237  | -0.20602 | -1.65488 |
| H                      | -0.29319 | -0.68628 | -2.19965 | H                | 1.46964  | 0.82383  | -1.85780 | H                     | 1.54684  | 0.83079  | -1.83092 |
| C                      | -0.93371 | 0.11135  | -1.83402 | C                | 1.97258  | -0.06201 | -1.47490 | C                     | 2.05939  | -0.04484 | -1.43702 |
| H                      | -1.04574 | 3.30266  | 1.30267  | H                | 1.23427  | -3.01826 | 1.59871  | H                     | 1.36698  | -3.06203 | 1.61261  |
| H                      | 1.60025  | 0.01236  | 2.34120  | H                | -0.33593 | -1.22662 | 2.39955  | H                     | -0.20314 | -1.26511 | 2.32251  |
| C                      | -1.17477 | -2.69936 | -0.13129 | C                | -0.52881 | 2.46137  | -0.40019 | C                     | -0.61556 | 2.35299  | -0.56313 |
| H                      | -0.32773 | -3.28378 | -0.48200 | H                | -1.52943 | 2.19919  | -0.73129 | H                     | -1.55557 | 1.98072  | -0.95992 |
| C                      | -2.45209 | -2.99176 | -0.54550 | C                | 0.11141  | 3.59581  | -0.85915 | C                     | -0.07895 | 3.55786  | -0.98350 |
| H                      | -2.62775 | -3.81799 | -1.22763 | H                | -0.40116 | 4.25408  | -1.55381 | H                     | -0.61353 | 4.14817  | -1.72136 |
| C                      | -3.54594 | -2.22209 | -0.08390 | C                | 1.42251  | 3.91730  | -0.44274 | C                     | 1.14763  | 4.03726  | -0.47573 |
| H                      | -4.55135 | -2.46699 | -0.41315 | H                | 1.90348  | 4.81160  | -0.82456 | H                     | 1.54680  | 4.98042  | -0.83242 |
| C                      | -3.33921 | -1.16944 | 0.77548  | C                | 2.08116  | 3.09982  | 0.44278  | C                     | 1.82394  | 3.30949  | 0.47282  |
| H                      | -4.17622 | -0.57188 | 1.12938  | H                | 3.08986  | 3.33042  | 0.77387  | H                     | 2.76481  | 3.66246  | 0.88524  |
| C                      | -2.03225 | -0.84411 | 1.21752  | C                | 1.44107  | 1.93538  | 0.93747  | C                     | 1.28439  | 2.08006  | 0.93154  |
| C                      | -0.93128 | -1.62607 | 0.76509  | C                | 0.12837  | 1.61299  | 0.50759  | C                     | 0.06279  | 1.59265  | 0.39746  |
| H                      | 1.23217  | -1.83884 | 0.79487  | H                | -1.56079 | 0.29738  | 0.90717  | H                     | -1.52132 | 0.19763  | 0.84876  |
| C                      | 0.38222  | -1.28775 | 1.18676  | C                | -0.47053 | 0.36007  | 0.94574  | C                     | -0.42483 | 0.26382  | 0.80175  |
| C                      | 0.58632  | -0.23565 | 2.04862  | C                | 0.17222  | -0.35389 | 1.99713  | C                     | 0.22192  | -0.33747 | 1.94664  |
| H                      | -0.32919 | 1.36357  | 3.19256  | H                | 1.96450  | -0.63464 | 3.15865  | H                     | 1.90140  | -0.35225 | 3.28604  |
| C                      | -0.50653 | 0.53770  | 2.50843  | C                | 1.45380  | -0.03060 | 2.41704  | C                     | 1.39233  | 0.15774  | 2.47661  |
| H                      | -2.62713 | 0.84641  | 2.43197  | H                | 3.10640  | 1.31075  | 2.15285  | H                     | 2.87961  | 1.70024  | 2.32025  |
| C                      | -1.78309 | 0.24961  | 2.09217  | C                | 2.08587  | 1.07450  | 1.85879  | C                     | 1.93153  | 1.32916  | 1.93617  |
| B                      | 3.70029  | -0.77235 | -0.37537 | B                | -3.86591 | -0.13501 | -0.26371 | B                     | -3.84829 | -0.26209 | -0.23585 |
| F                      | 2.65956  | -1.53392 | -0.96207 | F                | -2.80423 | 0.49685  | -0.97573 | F                     | -2.80269 | 0.27810  | -1.03990 |
| F                      | 3.32166  | -0.45255 | 0.94195  | F                | -3.43148 | -0.30580 | 1.06712  | F                     | -3.39015 | -0.26063 | 1.09951  |
| F                      | 4.88673  | -1.47695 | -0.39323 | F                | -4.99382 | 0.65939  | -0.30930 | F                     | -4.97997 | 0.51847  | -0.36011 |
| F                      | 3.81572  | 0.42964  | -1.10021 | F                | -4.09302 | -1.38781 | -0.83541 | F                     | -4.07926 | -1.57562 | -0.64166 |

| 42                           |          |          |          | 42                     |          |          |          | 42                          |          |          |          |
|------------------------------|----------|----------|----------|------------------------|----------|----------|----------|-----------------------------|----------|----------|----------|
| <b>1st deproton reactant</b> |          |          |          | <b>1st deproton TS</b> |          |          |          | <b>1st deproton product</b> |          |          |          |
| H                            | 5.13403  | -1.47429 | -1.32648 | H                      | 5.60222  | 1.49095  | -0.71181 | H                           | 5.82120  | 1.73848  | -0.31408 |
| C                            | 1.20850  | -3.19348 | 0.52775  | C                      | 3.02406  | -2.10594 | 0.74862  | C                           | 3.30553  | -2.08311 | 0.52812  |
| H                            | 1.62164  | -4.18227 | 0.29862  | H                      | 3.87083  | -2.75132 | 0.48373  | H                           | 4.10926  | -2.68281 | 0.08102  |
| C                            | -0.26651 | -3.16519 | 0.24321  | C                      | 1.73576  | -2.81154 | 0.43820  | C                           | 1.98134  | -2.71826 | 0.22934  |
| H                            | -0.83163 | -4.07318 | 0.43590  | H                      | 1.67111  | -3.86159 | 0.71322  | H                           | 1.89585  | -3.78679 | 0.41350  |
| C                            | -0.88883 | -2.07664 | -0.21213 | C                      | 0.69600  | -2.22171 | -0.14812 | C                           | 0.93125  | -2.05072 | -0.24149 |
| H                            | -1.95907 | -2.06658 | -0.40020 | H                      | -0.21327 | -2.78149 | -0.35210 | H                           | 0.00095  | -2.57818 | -0.43793 |
| C                            | -0.14116 | -0.81069 | -0.47921 | C                      | 0.69296  | -0.76597 | -0.53674 | C                           | 0.92861  | -0.56929 | -0.52234 |
| H                            | -0.61972 | -0.25625 | -1.28817 | H                      | 0.21542  | -0.68401 | -1.51499 | H                           | 0.53583  | -0.43988 | -1.53526 |
| C                            | 1.33023  | -0.99668 | -0.71610 | C                      | 2.08710  | -0.16411 | -0.59731 | C                           | 2.32200  | 0.04706  | -0.46128 |
| C                            | 1.98144  | -2.13454 | -0.22256 | C                      | 3.17132  | -0.78017 | 0.03643  | C                           | 3.41941  | -0.65733 | 0.04149  |
| H                            | 3.84895  | -3.18268 | -0.07837 | H                      | 5.26911  | -0.65773 | 0.47213  | H                           | 5.52066  | -0.58836 | 0.47280  |
| C                            | 3.34976  | -2.29115 | -0.45055 | C                      | 4.42822  | -0.16906 | -0.01505 | C                           | 4.67018  | -0.03128 | 0.08526  |
| C                            | 4.07121  | -1.33398 | -1.15482 | C                      | 4.61780  | 1.03412  | -0.68122 | C                           | 4.84159  | 1.27232  | -0.35755 |
| H                            | 3.97350  | 0.53953  | -2.21922 | H                      | 3.67508  | 2.57561  | -1.85974 | H                           | 3.86381  | 2.99344  | -1.21704 |
| C                            | 3.42238  | -0.20603 | -1.65487 | C                      | 3.53922  | 1.64161  | -1.32335 | C                           | 3.74703  | 1.97421  | -0.86198 |
| H                            | 1.54685  | 0.83078  | -1.83092 | H                      | 1.44845  | 1.51169  | -1.78568 | H                           | 1.64857  | 1.91327  | -1.29372 |
| C                            | 2.05940  | -0.04485 | -1.43702 | C                      | 2.28820  | 1.04080  | -1.28010 | C                           | 2.50295  | 1.36143  | -0.90929 |
| H                            | 1.36698  | -3.06203 | 1.61261  | H                      | 3.11132  | -1.95729 | 1.83629  | H                           | 3.49164  | -2.11905 | 1.61184  |
| H                            | -0.20314 | -1.26511 | 2.32250  | H                      | 0.73780  | -0.93646 | 2.13366  | H                           | 0.72171  | -0.95773 | 2.10430  |
| C                            | -0.61555 | 2.35299  | -0.56314 | C                      | -1.25809 | 1.51444  | -1.29850 | C                           | -1.02840 | 1.62772  | -1.33097 |
| H                            | -1.55555 | 1.98072  | -0.95994 | H                      | -1.08289 | 0.75980  | -2.05395 | H                           | -0.48161 | 1.11162  | -2.11142 |
| C                            | -0.07894 | 3.55786  | -0.98352 | C                      | -1.91780 | 2.67702  | -1.63533 | C                           | -1.87360 | 2.65015  | -1.68079 |
| H                            | -0.61352 | 4.14816  | -1.72138 | H                      | -2.22367 | 2.83336  | -2.66500 | H                           | -1.97630 | 2.92883  | -2.72469 |
| C                            | 1.14763  | 4.03727  | -0.47573 | C                      | -2.21720 | 3.66037  | -0.66817 | C                           | -2.61978 | 3.33808  | -0.69640 |
| H                            | 1.54680  | 4.98043  | -0.83242 | H                      | -2.74365 | 4.56264  | -0.95996 | H                           | -3.28509 | 4.14427  | -0.98837 |
| C                            | 1.82393  | 3.30950  | 0.47282  | C                      | -1.85823 | 3.45512  | 0.63870  | C                           | -2.50369 | 2.97801  | 0.62002  |
| H                            | 2.76480  | 3.66247  | 0.88526  | H                      | -2.09700 | 4.18507  | 1.40688  | H                           | -3.07497 | 3.49132  | 1.38873  |
| C                            | 1.28439  | 2.08006  | 0.93154  | C                      | -1.17418 | 2.26922  | 1.01198  | C                           | -1.63495 | 1.92671  | 1.01456  |
| C                            | 0.06279  | 1.59265  | 0.39745  | C                      | -0.84568 | 1.29121  | 0.03017  | C                           | -0.86998 | 1.23559  | 0.02698  |
| H                            | -1.52132 | 0.19763  | 0.84875  | H                      | -1.16200 | -0.65127 | 0.66959  | H                           | -1.59623 | -0.99882 | 0.99974  |
| C                            | -0.42483 | 0.26382  | 0.80174  | C                      | -0.17191 | 0.05986  | 0.46113  | C                           | 0.00277  | 0.17219  | 0.44783  |
| C                            | 0.22192  | -0.33747 | 1.94663  | C                      | 0.20476  | -0.03707 | 1.83174  | C                           | 0.06182  | -0.15239 | 1.79198  |
| H                            | 1.90138  | -0.35224 | 3.28606  | H                      | 0.08370  | 0.76048  | 3.82861  | H                           | -0.62653 | 0.24713  | 3.80847  |
| C                            | 1.39232  | 0.15775  | 2.47662  | C                      | -0.16221 | 0.90685  | 2.78360  | C                           | -0.70269 | 0.53825  | 2.76612  |
| H                            | 2.87959  | 1.70026  | 2.32027  | H                      | -1.09352 | 2.80873  | 3.09266  | H                           | -2.12652 | 2.09523  | 3.11426  |
| C                            | 1.93152  | 1.32917  | 1.93618  | C                      | -0.82098 | 2.04805  | 2.36431  | C                           | -1.53033 | 1.55749  | 2.38240  |
| B                            | -3.84829 | -0.26209 | -0.23585 | B                      | -2.75380 | -2.03862 | -0.42652 | B                           | -2.73100 | -2.07749 | -0.73917 |
| F                            | -2.80269 | 0.27810  | -1.03990 | F                      | -2.05905 | -1.29519 | -1.38659 | F                           | -1.89666 | -1.27263 | -1.42138 |
| F                            | -3.39013 | -0.26067 | 1.09950  | F                      | -2.27182 | -1.53905 | 0.87010  | F                           | -2.48051 | -1.38019 | 0.90833  |
| F                            | -4.97996 | 0.51849  | -0.36006 | F                      | -4.10506 | -1.82210 | -0.48842 | F                           | -4.04030 | -1.86878 | -0.85292 |
| F                            | -4.07929 | -1.57561 | -0.64169 | F                      | -2.41460 | -3.37396 | -0.50251 | F                           | -2.30407 | -3.32569 | -0.51273 |

| 42                                     |          |          |          | 42                               |          |          |          | 42                                    |          |          |          |
|----------------------------------------|----------|----------|----------|----------------------------------|----------|----------|----------|---------------------------------------|----------|----------|----------|
| <b>2nd proton reactant (pathway A)</b> |          |          |          | <b>2nd proton TS (pathway A)</b> |          |          |          | <b>2nd proton product (pathway A)</b> |          |          |          |
| H                                      | -6.46516 | -0.56651 | 1.04446  | H                                | 6.71510  | -0.74587 | -0.58656 | H                                     | 6.74494  | -0.83531 | -0.62101 |
| C                                      | -3.12970 | 2.22220  | -0.62085 | C                                | 3.33754  | 2.41706  | -0.08153 | C                                     | 3.45857  | 2.42046  | -0.09607 |
| H                                      | -3.86058 | 2.69784  | -1.28918 | H                                | 3.98357  | 3.05702  | 0.53558  | H                                     | 4.12073  | 3.04300  | 0.52168  |
| C                                      | -1.78277 | 2.20611  | -1.27758 | C                                | 1.91107  | 2.58602  | 0.34324  | C                                     | 2.03758  | 2.62716  | 0.33119  |
| H                                      | -1.40498 | 3.15906  | -1.64055 | H                                | 1.50187  | 3.59197  | 0.28871  | H                                     | 1.65501  | 3.64351  | 0.27783  |
| C                                      | -1.03861 | 1.11323  | -1.41830 | C                                | 1.13280  | 1.59163  | 0.75848  | C                                     | 1.23549  | 1.65434  | 0.75236  |
| H                                      | -0.05228 | 1.18266  | -1.87362 | H                                | 0.08992  | 1.78198  | 1.00538  | H                                     | 0.20008  | 1.87172  | 1.01000  |
| C                                      | -1.43657 | -0.25178 | -0.90702 | C                                | 1.57675  | 0.14778  | 0.82749  | C                                     | 1.64390  | 0.20092  | 0.82637  |
| H                                      | -1.40968 | -0.96172 | -1.74459 | H                                | 1.49948  | -0.19844 | 1.86680  | H                                     | 1.56182  | -0.13852 | 1.86704  |
| C                                      | -2.85024 | -0.29299 | -0.35810 | C                                | 3.02231  | -0.06043 | 0.41425  | C                                     | 3.08159  | -0.04640 | 0.40681  |
| C                                      | -3.63516 | 0.85426  | -0.22574 | C                                | 3.83634  | 0.99262  | -0.00902 | C                                     | 3.92023  | 0.98347  | -0.02504 |
| H                                      | -5.54343 | 1.63155  | 0.37873  | H                                | 5.79306  | 1.54803  | -0.69525 | H                                     | 5.88651  | 1.48231  | -0.72811 |
| C                                      | -4.93538 | 0.73452  | 0.28145  | C                                | 5.16379  | 0.72384  | -0.36643 | C                                     | 5.23692  | 0.67703  | -0.39215 |
| C                                      | -5.45460 | -0.49647 | 0.65366  | C                                | 5.68297  | -0.56074 | -0.30513 | C                                     | 5.72055  | -0.62148 | -0.33193 |
| H                                      | -5.06392 | -2.61461 | 0.80196  | H                                | 5.26516  | -2.62094 | 0.18753  | H                                     | 5.25033  | -2.66859 | 0.16780  |
| C                                      | -4.67042 | -1.64340 | 0.51804  | C                                | 4.87113  | -1.61123 | 0.12665  | C                                     | 4.88373  | -1.64858 | 0.10829  |
| H                                      | -2.76102 | -2.42108 | -0.08537 | H                                | 2.91441  | -2.16923 | 0.81257  | H                                     | 2.91812  | -2.15047 | 0.81218  |
| C                                      | -3.38241 | -1.53352 | 0.01589  | C                                | 3.55541  | -1.35457 | 0.48132  | C                                     | 3.57853  | -1.35477 | 0.47283  |
| H                                      | -3.09156 | 2.86883  | 0.26772  | H                                | 3.45781  | 2.79492  | -1.10651 | H                                     | 3.58797  | 2.79668  | -1.12040 |
| H                                      | -1.53339 | -0.09035 | 1.79480  | H                                | 1.83608  | -0.67890 | -1.72880 | H                                     | 1.86830  | -0.58319 | -1.73723 |
| C                                      | 1.17610  | -1.44405 | -1.70929 | C                                | -1.07682 | -0.71818 | 1.86393  | C                                     | -1.00918 | -0.66138 | 1.88656  |
| H                                      | 0.42439  | -1.25093 | -2.46662 | H                                | -0.35545 | -0.28418 | 2.54553  | H                                     | -0.28064 | -0.22924 | 2.56136  |
| C                                      | 2.40472  | -1.91082 | -2.10601 | C                                | -2.33173 | -0.97466 | 2.30846  | C                                     | -2.25425 | -0.91710 | 2.33407  |
| H                                      | 2.60549  | -2.08683 | -3.15764 | H                                | -2.61657 | -0.74091 | 3.32864  | H                                     | -2.53042 | -0.69104 | 3.35875  |
| C                                      | 3.42464  | -2.14366 | -1.14865 | C                                | -3.35016 | -1.47456 | 1.39907  | C                                     | -3.30066 | -1.43754 | 1.43775  |
| H                                      | 4.39895  | -2.49831 | -1.46961 | H                                | -4.21934 | -1.97948 | 1.82240  | H                                     | -3.94811 | -2.19986 | 1.88964  |
| C                                      | 3.17093  | -1.91915 | 0.18597  | C                                | -2.93567 | -1.86628 | 0.09621  | C                                     | -2.86918 | -1.80215 | 0.10023  |
| H                                      | 3.94515  | -2.08627 | 0.92992  | H                                | -3.66731 | -2.29209 | -0.58450 | H                                     | -3.59503 | -2.25006 | -0.57088 |
| C                                      | 1.89857  | -1.46033 | 0.62482  | C                                | -1.65046 | -1.59691 | -0.37303 | C                                     | -1.59146 | -1.54141 | -0.36187 |
| C                                      | 0.87971  | -1.19795 | -0.33804 | C                                | -0.69387 | -0.99340 | 0.50774  | C                                     | -0.63454 | -0.92664 | 0.51747  |
| H                                      | 3.39522  | -0.02960 | -0.92611 | H                                | -3.86410 | -0.43315 | 1.02395  | H                                     | -4.01742 | -0.59101 | 1.24162  |
| C                                      | -0.38144 | -0.68561 | 0.10883  | C                                | 0.58550  | -0.65796 | -0.00942 | C                                     | 0.63384  | -0.58823 | -0.00388 |
| C                                      | -0.58007 | -0.48349 | 1.45356  | C                                | 0.86140  | -0.95002 | -1.33198 | C                                     | 0.89755  | -0.86608 | -1.33796 |
| H                                      | 0.22826  | -0.58556 | 3.45744  | H                                | 0.20045  | -1.76988 | -3.22220 | H                                     | 0.23479  | -1.67134 | -3.23335 |
| C                                      | 0.42761  | -0.76225 | 2.40507  | C                                | -0.07176 | -1.57098 | -2.19146 | C                                     | -0.03152 | -1.48694 | -2.19880 |
| H                                      | 2.44086  | -1.42498 | 2.71824  | H                                | -2.07460 | -2.31840 | -2.36975 | H                                     | -2.02896 | -2.25687 | -2.35872 |
| C                                      | 1.64769  | -1.23120 | 2.00177  | C                                | -1.31896 | -1.88048 | -1.72486 | C                                     | -1.26950 | -1.81645 | -1.72018 |
| B                                      | 2.95618  | 1.79292  | 0.65045  | B                                | -3.61275 | 1.25990  | -0.52194 | B                                     | -3.84645 | 1.15592  | -0.49404 |
| F                                      | 1.63929  | 1.65540  | 0.70429  | F                                | -2.30855 | 1.31236  | -0.04158 | F                                     | -2.57656 | 1.18633  | 0.10303  |
| F                                      | 3.21822  | 0.89277  | -1.08631 | F                                | -4.44970 | 0.84872  | 0.60888  | F                                     | -4.80475 | 0.94653  | 0.53171  |
| F                                      | 3.46968  | 2.96053  | 0.28811  | F                                | -4.05846 | 2.47526  | -0.96849 | F                                     | -4.11061 | 2.32657  | -1.17049 |
| F                                      | 3.72294  | 0.94355  | 1.33511  | F                                | -3.74344 | 0.25551  | -1.47855 | F                                     | -3.90861 | 0.04717  | -1.36474 |

| 60                          |          |          |          | 60                    |          |          |          | 60                         |          |          |          |
|-----------------------------|----------|----------|----------|-----------------------|----------|----------|----------|----------------------------|----------|----------|----------|
| 2nd EA reactant (pathway A) |          |          |          | 2nd EA TS (pathway A) |          |          |          | 2nd EA product (pathway A) |          |          |          |
| H                           | -5.77990 | 2.16854  | 2.45540  | H                     | -5.73774 | 2.20614  | 2.41831  | H                          | -5.68478 | 2.23124  | 2.44102  |
| C                           | -5.78983 | -0.66409 | -1.24142 | C                     | -5.79319 | -0.68326 | -1.23393 | C                          | -5.79225 | -0.67094 | -1.20031 |
| H                           | -6.80461 | -1.00597 | -0.99681 | H                     | -6.81909 | -0.98254 | -0.98071 | H                          | -6.82162 | -0.95065 | -0.93921 |
| C                           | -5.03060 | -1.78512 | -1.88476 | C                     | -5.06767 | -1.84698 | -1.84066 | C                          | -5.08798 | -1.85190 | -1.79908 |
| H                           | -5.49724 | -2.25940 | -2.74494 | H                     | -5.56132 | -2.35227 | -2.66745 | H                          | -5.59773 | -2.36345 | -2.61213 |
| C                           | -3.84618 | -2.22043 | -1.46291 | C                     | -3.87790 | -2.27583 | -1.42783 | C                          | -3.89709 | -2.28651 | -1.39575 |
| H                           | -3.34871 | -3.03729 | -1.98069 | H                     | -3.40045 | -3.11884 | -1.92201 | H                          | -3.43419 | -3.14096 | -1.88410 |
| C                           | -3.09843 | -1.63048 | -0.29428 | C                     | -3.09440 | -1.64448 | -0.30612 | C                          | -3.09180 | -1.64613 | -0.29487 |
| H                           | -2.88485 | -2.44676 | 0.40300  | H                     | -2.84840 | -2.44210 | 0.40242  | H                          | -2.83422 | -2.43783 | 0.41622  |
| C                           | -3.89700 | -0.57633 | 0.45601  | C                     | -3.88342 | -0.58054 | 0.44287  | C                          | -3.86676 | -0.57506 | 0.45849  |
| C                           | -5.13568 | -0.11649 | 0.00550  | C                     | -5.12365 | -0.11904 | -0.00259 | C                          | -5.10769 | -0.10620 | 0.02263  |
| H                           | -6.76294 | 1.23143  | 0.38911  | H                     | -6.74034 | 1.24352  | 0.37306  | H                          | -6.71147 | 1.26890  | 0.40760  |
| C                           | -5.79785 | 0.87424  | 0.74147  | C                     | -5.77413 | 0.88694  | 0.72321  | C                          | -5.74463 | 0.90696  | 0.75048  |
| C                           | -5.24917 | 1.40012  | 1.90215  | C                     | -5.21471 | 1.42751  | 1.87194  | C                          | -5.17164 | 1.44751  | 1.89253  |
| H                           | -3.57420 | 1.32997  | 3.26537  | H                     | -3.53623 | 1.35804  | 3.23022  | H                          | -3.48388 | 1.36788  | 3.23872  |
| C                           | -4.01390 | 0.93211  | 2.35557  | C                     | -3.98060 | 0.95551  | 2.32413  | C                          | -3.93755 | 0.96727  | 2.33615  |
| H                           | -2.38170 | -0.41272 | 1.96562  | H                     | -2.36491 | -0.41136 | 1.94779  | H                          | -2.33648 | -0.41557 | 1.95171  |
| C                           | -3.35106 | -0.04742 | 1.63096  | C                     | -3.32903 | -0.03824 | 1.60805  | C                          | -3.29925 | -0.03352 | 1.61771  |
| H                           | -5.93143 | 0.14618  | -1.97094 | H                     | -5.90609 | 0.10931  | -1.98792 | H                          | -5.89565 | 0.11659  | -1.96105 |
| H                           | -2.82564 | 0.22662  | -2.12860 | H                     | -2.85302 | -0.02096 | -2.38195 | H                          | -2.87435 | -0.06503 | -2.41371 |
| C                           | -0.31821 | -2.39682 | 0.76347  | C                     | -0.32967 | -2.17581 | 0.88769  | C                          | -0.31826 | -2.14856 | 0.88259  |
| H                           | -1.18603 | -2.81648 | 1.25828  | H                     | -1.19597 | -2.54446 | 1.42612  | H                          | -1.17804 | -2.49906 | 1.44395  |
| C                           | 0.91246  | -2.80165 | 1.13652  | C                     | 0.89573  | -2.57957 | 1.26677  | C                          | 0.91003  | -2.55851 | 1.24593  |
| H                           | 1.02910  | -3.55172 | 1.91243  | H                     | 1.00424  | -3.28562 | 2.08551  | H                          | 1.02290  | -3.25083 | 2.07643  |
| C                           | 2.13304  | -2.27989 | 0.49186  | C                     | 2.12655  | -2.12938 | 0.55714  | C                          | 2.13601  | -2.12706 | 0.50939  |
| H                           | 2.94583  | -2.01131 | 1.18587  | H                     | 3.00776  | -2.07590 | 1.20092  | H                          | 3.02301  | -2.09873 | 1.14602  |
| C                           | 1.92490  | -1.18855 | -0.45186 | C                     | 1.93000  | -0.84356 | -0.19258 | C                          | 1.94252  | -0.79448 | -0.18841 |
| H                           | 2.80974  | -0.72035 | -0.88277 | H                     | 2.78186  | -0.57529 | -0.81737 | H                          | 2.76780  | -0.59234 | -0.87396 |
| C                           | 0.65678  | -0.80183 | -0.86926 | C                     | 0.61716  | -0.64860 | -0.80874 | C                          | 0.61110  | -0.65126 | -0.84369 |
| C                           | -0.50925 | -1.41902 | -0.28934 | C                     | -0.52658 | -1.28059 | -0.25156 | C                          | -0.52662 | -1.27268 | -0.27268 |
| H                           | 2.64910  | -3.06849 | -0.09423 | H                     | 2.40355  | -2.87019 | -0.21220 | H                          | 2.37507  | -2.86175 | -0.27439 |
| C                           | -1.77410 | -1.03791 | -0.77796 | C                     | -1.79105 | -1.04126 | -0.83655 | C                          | -1.79648 | -1.04988 | -0.85296 |
| C                           | -1.83938 | -0.05863 | -1.76715 | C                     | -1.87547 | -0.19606 | -1.93923 | C                          | -1.89381 | -0.23024 | -1.97437 |
| H                           | -0.82575 | 1.33686  | -3.06988 | H                     | -0.84434 | 1.04758  | -3.36678 | H                          | -0.86664 | 0.96584  | -3.44178 |
| C                           | -0.70958 | 0.56880  | -2.31375 | C                     | -0.74689 | 0.40734  | -2.49604 | C                          | -0.76745 | 0.35139  | -2.55242 |
| H                           | 1.43975  | 0.65968  | -2.25977 | H                     | 1.38564  | 0.64287  | -2.34749 | H                          | 1.36733  | 0.58524  | -2.42810 |
| C                           | 0.53566  | 0.19861  | -1.87043 | C                     | 0.49501  | 0.17967  | -1.93199 | C                          | 0.48104  | 0.13560  | -1.98928 |
| B                           | 5.23804  | -1.04669 | -0.03297 | B                     | 5.31732  | -1.04040 | -0.03239 | B                          | 5.34371  | -0.99538 | 0.00936  |
| F                           | 4.68684  | -2.15668 | -0.69921 | F                     | 4.71121  | -2.12830 | -0.67008 | F                          | 4.76415  | -2.08795 | -0.64194 |
| F                           | 4.80411  | -1.07635 | 1.31309  | F                     | 4.90606  | -1.01540 | 1.32219  | F                          | 4.89545  | -0.96729 | 1.35281  |
| F                           | 6.61294  | -1.05564 | -0.10280 | F                     | 6.69125  | -1.10235 | -0.11902 | F                          | 6.72135  | -1.05152 | -0.03558 |
| F                           | 4.71313  | 0.12238  | -0.63489 | F                     | 4.83738  | 0.14804  | -0.64210 | F                          | 4.87951  | 0.19001  | -0.61564 |
| C                           | 2.45986  | 1.02280  | 1.32588  | C                     | 2.27910  | 0.60586  | 1.03163  | C                          | 2.21151  | 0.49203  | 0.93544  |
| C                           | 1.99472  | 2.00462  | 0.40843  | C                     | 1.92505  | 1.80219  | 0.27967  | C                          | 1.88331  | 1.74599  | 0.22847  |
| C                           | 0.61874  | 2.36594  | 0.41665  | C                     | 0.62251  | 2.33932  | 0.42946  | C                          | 0.60201  | 2.32139  | 0.41600  |
| C                           | -0.25814 | 1.72049  | 1.33125  | C                     | -0.24792 | 1.77021  | 1.40152  | C                          | -0.25197 | 1.77688  | 1.41117  |
| C                           | 0.21812  | 0.78601  | 2.21809  | C                     | 0.17119  | 0.78018  | 2.27076  | C                          | 0.16425  | 0.78175  | 2.28811  |
| C                           | 1.58896  | 0.43609  | 2.21678  | C                     | 1.44042  | 0.22434  | 2.11096  | C                          | 1.39203  | 0.17585  | 2.08342  |
| C                           | 0.15417  | 3.33551  | -0.51107 | C                     | 0.21553  | 3.43298  | -0.37000 | C                          | 0.20225  | 3.43607  | -0.35674 |
| C                           | 1.01381  | 3.89812  | -1.42045 | C                     | 1.09030  | 3.98269  | -1.27873 | C                          | 1.07422  | 3.98117  | -1.27264 |
| C                           | 2.37896  | 3.51623  | -1.44666 | C                     | 2.38986  | 3.45427  | -1.41304 | C                          | 2.35561  | 3.42327  | -1.43314 |

|   |          |          |          |   |          |          |          |   |          |          |          |
|---|----------|----------|----------|---|----------|----------|----------|---|----------|----------|----------|
| C | 2.86097  | 2.59198  | -0.55248 | C | 2.80435  | 2.37565  | -0.65360 | C | 2.75686  | 2.31356  | -0.70427 |
| H | -1.31397 | 1.98363  | 1.31930  | H | -1.25828 | 2.16686  | 1.48578  | H | -1.24817 | 2.20199  | 1.52376  |
| H | -0.45467 | 0.31110  | 2.92726  | H | -0.48666 | 0.42182  | 3.05564  | H | -0.47508 | 0.47106  | 3.10755  |
| H | 1.95718  | -0.30471 | 2.92150  | H | 1.78628  | -0.54393 | 2.79564  | H | 1.74221  | -0.58767 | 2.77114  |
| H | -0.89710 | 3.61312  | -0.49458 | H | -0.78923 | 3.82897  | -0.25232 | H | -0.78926 | 3.85495  | -0.21044 |
| H | 0.64994  | 4.63656  | -2.12861 | H | 0.78500  | 4.82519  | -1.89048 | H | 0.78044  | 4.84120  | -1.86476 |
| H | 3.04536  | 3.96036  | -2.17970 | H | 3.07658  | 3.90021  | -2.12585 | H | 3.04469  | 3.86748  | -2.14491 |
| H | 3.89800  | 2.27196  | -0.57452 | H | 3.79511  | 1.94996  | -0.77133 | H | 3.73613  | 1.86957  | -0.84789 |
| H | 3.50457  | 0.72736  | 1.30123  | H | 3.33767  | 0.35828  | 1.10984  | H | 3.28017  | 0.32690  | 1.10119  |

| 60                                |          |          |          | 60                          |          |          |          | 60                               |          |          |          |
|-----------------------------------|----------|----------|----------|-----------------------------|----------|----------|----------|----------------------------------|----------|----------|----------|
| 2nd deproton reactant (pathway A) |          |          |          | 2nd deproton TS (pathway A) |          |          |          | 2nd deproton product (pathway A) |          |          |          |
| H                                 | -5.68577 | 2.22977  | 2.44164  | H                           | 5.25405  | 3.38968  | -1.72000 | H                                | 6.19562  | 3.02438  | -2.38421 |
| C                                 | -5.79219 | -0.67123 | -1.20062 | C                           | 6.21042  | -0.48997 | 0.66064  | C                                | 6.64914  | -0.35296 | 0.78403  |
| H                                 | -6.82149 | -0.95132 | -0.93961 | H                           | 7.14772  | -0.64257 | 0.10718  | H                                | 7.58919  | -0.69743 | 0.33053  |
| C                                 | -5.08756 | -1.85178 | -1.79975 | C                           | 5.64916  | -1.81914 | 1.06372  | C                                | 5.93819  | -1.51917 | 1.40120  |
| H                                 | -5.59709 | -2.36323 | -2.61300 | H                           | 6.29391  | -2.46145 | 1.65936  | H                                | 6.49132  | -2.09072 | 2.14324  |
| C                                 | -3.89657 | -2.28617 | -1.39650 | C                           | 4.43223  | -2.24036 | 0.73143  | C                                | 4.69654  | -1.87961 | 1.08904  |
| H                                 | -3.43335 | -3.14029 | -1.88514 | H                           | 4.08588  | -3.21693 | 1.06320  | H                                | 4.23842  | -2.73592 | 1.57943  |
| C                                 | -3.09154 | -1.64600 | -0.29531 | C                           | 3.44780  | -1.44750 | -0.08810 | C                                | 3.82687  | -1.16310 | 0.08775  |
| H                                 | -2.83402 | -2.43791 | 0.41558  | H                           | 3.25118  | -2.03521 | -0.99158 | H                                | 3.57946  | -1.88942 | -0.69333 |
| C                                 | -3.86675 | -0.57529 | 0.45827  | C                           | 3.99085  | -0.09185 | -0.52787 | C                                | 4.52979  | 0.00877  | -0.58224 |
| C                                 | -5.10782 | -0.10667 | 0.02251  | C                           | 5.26940  | 0.34739  | -0.17452 | C                                | 5.83521  | 0.38319  | -0.25519 |
| H                                 | -6.71203 | 1.26780  | 0.40783  | H                           | 6.69969  | 1.94066  | -0.32963 | H                                | 7.43285  | 1.76116  | -0.65345 |
| C                                 | -5.74510 | 0.90604  | 0.75065  | C                           | 5.70385  | 1.60495  | -0.61146 | C                                | 6.41639  | 1.47353  | -0.91422 |
| C                                 | -5.17235 | 1.44640  | 1.89291  | C                           | 4.89535  | 2.41942  | -1.39040 | C                                | 5.72489  | 2.18293  | -1.88505 |
| H                                 | -3.48474 | 1.36686  | 3.23920  | H                           | 2.97255  | 2.60521  | -2.35314 | H                                | 3.86669  | 2.35240  | -2.97023 |
| C                                 | -3.93813 | 0.96643  | 2.33641  | C                           | 3.61949  | 1.97987  | -1.74501 | C                                | 4.42134  | 1.80659  | -2.21315 |
| H                                 | -2.33653 | -0.41572 | 1.95150  | H                           | 2.17448  | 0.40590  | -1.56930 | H                                | 2.81259  | 0.44620  | -1.79845 |
| C                                 | -3.29945 | -0.03390 | 1.61766  | C                           | 3.17752  | 0.73901  | -1.31034 | C                                | 3.83560  | 0.73217  | -1.56041 |
| H                                 | -5.89579 | 0.11651  | -1.96112 | H                           | 6.49919  | 0.07357  | 1.55902  | H                                | 6.95482  | 0.34889  | 1.57310  |
| H                                 | -2.87392 | -0.06406 | -2.41341 | H                           | 3.17944  | -0.74967 | 2.46312  | H                                | 3.66518  | 0.42279  | 2.19088  |
| C                                 | -0.31805 | -2.14901 | 0.88213  | C                           | 0.71176  | -1.95509 | -1.30547 | C                                | 1.03450  | -1.96143 | -0.83570 |
| H                                 | -1.17788 | -2.50000 | 1.44310  | H                           | 1.58202  | -2.02947 | -1.94866 | H                                | 1.86630  | -2.16401 | -1.50162 |
| C                                 | 0.91027  | -2.55880 | 1.24558  | C                           | -0.46432 | -2.41545 | -1.74648 | C                                | -0.15017 | -2.52466 | -1.08975 |
| H                                 | 1.02311  | -3.25153 | 2.07575  | H                           | -0.53328 | -2.87263 | -2.73098 | H                                | -0.26444 | -3.19134 | -1.94087 |
| C                                 | 2.13637  | -2.12679 | 0.50960  | C                           | -1.71586 | -2.32786 | -0.91948 | C                                | -1.34321 | -2.30148 | -0.20523 |
| H                                 | 3.02308  | -2.09838 | 1.14664  | H                           | -2.60234 | -2.20825 | -1.54898 | H                                | -2.26701 | -2.36343 | -0.78876 |
| C                                 | 1.94275  | -0.79438 | -0.18831 | C                           | -1.65420 | -1.19961 | 0.11585  | C                                | -1.29633 | -0.97434 | 0.57658  |
| H                                 | 2.76824  | -0.59217 | -0.87352 | H                           | -2.44149 | -1.37277 | 0.85275  | H                                | -1.90842 | -1.12437 | 1.46582  |
| C                                 | 0.61143  | -0.65100 | -0.84347 | C                           | -0.29860 | -1.16425 | 0.81114  | C                                | 0.11855  | -0.62488 | 1.04248  |
| C                                 | -0.52633 | -1.27268 | -0.27278 | C                           | 0.87026  | -1.43247 | 0.06336  | C                                | 1.24923  | -1.08352 | 0.32913  |
| H                                 | 2.37589  | -2.86134 | -0.27418 | H                           | -1.87074 | -3.27723 | -0.38888 | H                                | -1.39878 | -3.12933 | 0.51564  |
| C                                 | -1.79617 | -1.04957 | -0.85306 | C                           | 2.13084  | -1.26564 | 0.66747  | C                                | 2.53325  | -0.70319 | 0.76226  |
| C                                 | -1.89340 | -0.22948 | -1.97411 | C                           | 2.20102  | -0.87880 | 2.00799  | C                                | 2.66601  | 0.13452  | 1.87293  |
| H                                 | -0.86612 | 0.96717  | -3.44101 | H                           | 1.12101  | -0.42171 | 3.80950  | H                                | 1.67162  | 1.23466  | 3.42900  |
| C                                 | -0.76698 | 0.35237  | -2.55188 | C                           | 1.05121  | -0.68747 | 2.75931  | C                                | 1.55453  | 0.58643  | 2.56601  |
| H                                 | 1.36780  | 0.58616  | -2.42727 | H                           | -1.09642 | -0.67732 | 2.74366  | H                                | -0.59197 | 0.55467  | 2.68699  |
| C                                 | 0.48144  | 0.13635  | -1.98877 | C                           | -0.19659 | -0.82912 | 2.15671  | C                                | 0.28263  | 0.19989  | 2.14840  |
| B                                 | 5.34411  | -0.99557 | 0.00886  | B                           | -5.04555 | -1.19493 | -0.23983 | B                                | -4.99243 | -1.82622 | -0.42905 |
| F                                 | 4.76469  | -2.08739 | -0.64386 | F                           | -4.57936 | -2.49302 | -0.26167 | F                                | -4.63889 | -2.93040 | -1.09690 |
| F                                 | 4.89766  | -0.97063 | 1.35292  | F                           | -4.32942 | -0.47100 | -1.33052 | F                                | -4.34818 | -0.58260 | -1.57856 |
| F                                 | 6.72160  | -1.04962 | -0.03854 | F                           | -6.38143 | -1.09272 | -0.50455 | F                                | -6.27331 | -1.46689 | -0.43396 |
| F                                 | 4.87706  | 0.19057  | -0.61298 | F                           | -4.67185 | -0.54889 | 0.93128  | F                                | -4.24558 | -1.50338 | 0.64208  |
| C                                 | 2.21225  | 0.49285  | 0.93574  | C                           | -1.92901 | 0.20564  | -0.52442 | C                                | -1.86804 | 0.21540  | -0.19142 |
| C                                 | 1.88332  | 1.74660  | 0.22887  | C                           | -2.05698 | 1.37868  | 0.35059  | C                                | -2.68800 | 1.21133  | 0.45405  |
| C                                 | 0.60138  | 2.32076  | 0.41615  | C                           | -1.72127 | 2.66471  | -0.15660 | C                                | -3.10657 | 2.35141  | -0.29695 |
| C                                 | -0.25221 | 1.77552  | 1.41128  | C                           | -1.29749 | 2.79611  | -1.50206 | C                                | -2.73364 | 2.48220  | -1.66144 |
| C                                 | 0.16489  | 0.78097  | 2.28838  | C                           | -1.22632 | 1.71661  | -2.35656 | C                                | -1.98205 | 1.51579  | -2.26959 |
| C                                 | 1.39319  | 0.17603  | 2.08366  | C                           | -1.49502 | 0.44118  | -1.85794 | C                                | -1.55139 | 0.38520  | -1.52949 |
| C                                 | 0.20062  | 3.43508  | -0.35654 | C                           | -1.83394 | 3.81279  | 0.66786  | C                                | -3.91137 | 3.34478  | 0.32033  |
| C                                 | 1.07222  | 3.98128  | -1.27211 | C                           | -2.29259 | 3.69530  | 1.95489  | C                                | -4.30319 | 3.22174  | 1.62691  |
| C                                 | 2.35431  | 3.42489  | -1.43210 | C                           | -2.67324 | 2.42786  | 2.44289  | C                                | -3.91371 | 2.08434  | 2.37000  |

|   |          |          |          |   |          |          |          |   |          |          |          |
|---|----------|----------|----------|---|----------|----------|----------|---|----------|----------|----------|
| C | 2.75663  | 2.31548  | -0.70334 | C | -2.56360 | 1.29690  | 1.66273  | C | -3.13411 | 1.10892  | 1.80114  |
| H | -1.24884 | 2.19969  | 1.52367  | H | -1.05406 | 3.79127  | -1.86757 | H | -3.06836 | 3.35685  | -2.21222 |
| H | -0.47422 | 0.46965  | 3.10774  | H | -0.94814 | 1.84737  | -3.39580 | H | -1.70723 | 1.60124  | -3.31564 |
| H | 1.74398  | -0.58740 | 2.77117  | H | -1.43528 | -0.40296 | -2.53464 | H | -0.93426 | -0.35864 | -2.02380 |
| H | -0.79139 | 3.85286  | -0.21041 | H | -1.56459 | 4.78113  | 0.25576  | H | -4.21313 | 4.20488  | -0.27109 |
| H | 0.77769  | 4.84106  | -1.86422 | H | -2.38398 | 4.57052  | 2.58923  | H | -4.91946 | 3.98571  | 2.09004  |
| H | 3.04326  | 3.87004  | -2.14341 | H | -3.07194 | 2.34134  | 3.44870  | H | -4.24261 | 1.97654  | 3.39868  |
| H | 3.73683  | 1.87350  | -0.84676 | H | -2.91311 | 0.34740  | 2.04419  | H | -2.87489 | 0.24108  | 2.39496  |
| H | 3.28099  | 0.32777  | 1.10036  | H | -3.11232 | 0.00837  | -0.92752 | H | -3.44306 | -0.33104 | -1.34748 |

| 42                                     |          |          |          | 42                               |          |          |          | 42                                    |          |          |          |
|----------------------------------------|----------|----------|----------|----------------------------------|----------|----------|----------|---------------------------------------|----------|----------|----------|
| <b>2nd proton reactant (pathway B)</b> |          |          |          | <b>2nd proton TS (pathway B)</b> |          |          |          | <b>2nd proton product (pathway B)</b> |          |          |          |
| H                                      | -5.61250 | -1.37190 | -2.01375 | H                                | -5.63697 | 0.38587  | 2.41115  | H                                     | -5.51508 | 0.42655  | 2.40667  |
| C                                      | -3.77944 | 1.74152  | 0.91626  | C                                | -3.66138 | -1.29322 | -1.45829 | C                                     | -3.53017 | -1.01832 | -1.55029 |
| H                                      | -4.37858 | 2.54805  | 0.47070  | H                                | -4.33473 | -2.15901 | -1.40803 | H                                     | -4.17056 | -1.91044 | -1.54548 |
| C                                      | -2.48037 | 2.30212  | 1.40976  | C                                | -2.33839 | -1.72102 | -2.02147 | C                                     | -2.20325 | -1.36442 | -2.15730 |
| H                                      | -2.54166 | 3.13620  | 2.10535  | H                                | -2.36378 | -2.31268 | -2.93360 | H                                     | -2.22519 | -1.87218 | -3.11886 |
| C                                      | -1.28694 | 1.84593  | 1.04064  | C                                | -1.16498 | -1.42586 | -1.46891 | C                                     | -1.03055 | -1.10782 | -1.58486 |
| H                                      | -0.38008 | 2.29778  | 1.43304  | H                                | -0.23249 | -1.76578 | -1.90898 | H                                     | -0.09423 | -1.39612 | -2.05305 |
| C                                      | -1.07220 | 0.70039  | 0.08616  | C                                | -1.01755 | -0.60088 | -0.21475 | C                                     | -0.88614 | -0.41509 | -0.25074 |
| H                                      | -0.47506 | 1.09737  | -0.74133 | H                                | -0.35391 | -1.15806 | 0.45130  | H                                     | -0.24547 | -1.05553 | 0.36059  |
| C                                      | -2.37161 | 0.14516  | -0.48571 | C                                | -2.33687 | -0.35287 | 0.50019  | C                                     | -2.20968 | -0.20269 | 0.46688  |
| C                                      | -3.62318 | 0.62561  | -0.09101 | C                                | -3.56559 | -0.66006 | -0.08894 | C                                     | -3.43651 | -0.47024 | -0.14488 |
| H                                      | -5.74733 | 0.44460  | -0.33866 | H                                | -5.69827 | -0.62984 | 0.15632  | H                                     | -5.56987 | -0.45131 | 0.09532  |
| C                                      | -4.77708 | 0.06497  | -0.65234 | C                                | -4.74319 | -0.38584 | 0.61659  | C                                     | -4.61592 | -0.23731 | 0.57247  |
| C                                      | -4.70416 | -0.95269 | -1.59190 | C                                | -4.71109 | 0.18216  | 1.88212  | C                                     | -4.58735 | 0.25353  | 1.87000  |
| H                                      | -3.37715 | -2.22511 | -2.72381 | H                                | -3.44076 | 0.92174  | 3.46338  | H                                     | -3.32218 | 0.89353  | 3.49797  |
| C                                      | -3.45449 | -1.42979 | -1.98879 | C                                | -3.48249 | 0.48339  | 2.47112  | C                                     | -3.36052 | 0.51644  | 2.48080  |
| H                                      | -1.33298 | -1.26441 | -1.73610 | H                                | -1.34930 | 0.45336  | 2.23122  | H                                     | -1.22653 | 0.49118  | 2.24824  |
| C                                      | -2.30621 | -0.88311 | -1.43484 | C                                | -2.31056 | 0.21624  | 1.77829  | C                                     | -2.18681 | 0.28820  | 1.77742  |
| H                                      | -4.37349 | 1.38422  | 1.76963  | H                                | -4.14897 | -0.59408 | -2.15414 | H                                     | -4.05388 | -0.29569 | -2.19347 |
| H                                      | -1.50849 | -0.33697 | 2.49217  | H                                | -1.92490 | 1.19506  | -1.94794 | H                                     | -1.83606 | 1.63513  | -1.67200 |
| C                                      | 1.31644  | -0.71410 | -1.15686 | C                                | 1.54229  | 0.48362  | 0.99648  | C                                     | 1.78380  | 0.40789  | 0.87097  |
| H                                      | 0.84273  | 0.08599  | -1.71453 | H                                | 1.15457  | -0.45283 | 1.37821  | H                                     | 1.33927  | -0.51414 | 1.23130  |
| C                                      | 2.40051  | -1.35325 | -1.72069 | C                                | 2.83547  | 0.86328  | 1.43575  | C                                     | 3.15453  | 0.66073  | 1.29588  |
| H                                      | 2.74563  | -1.05431 | -2.70551 | H                                | 3.19289  | 0.42490  | 2.36785  | H                                     | 3.26894  | 0.44675  | 2.36920  |
| C                                      | 3.06849  | -2.39128 | -1.01853 | C                                | 3.36542  | 2.14733  | 1.01308  | C                                     | 3.74837  | 1.95210  | 0.89460  |
| H                                      | 3.92332  | -2.88439 | -1.46904 | H                                | 4.32541  | 2.47285  | 1.39850  | H                                     | 4.76126  | 2.17250  | 1.21517  |
| C                                      | 2.62735  | -2.75511 | 0.22761  | C                                | 2.68159  | 2.89324  | 0.11161  | C                                     | 3.05249  | 2.82207  | 0.14214  |
| H                                      | 3.13074  | -3.54449 | 0.77915  | H                                | 3.07327  | 3.84550  | -0.23306 | H                                     | 3.48025  | 3.77394  | -0.15790 |
| C                                      | 1.51221  | -2.11405 | 0.83333  | C                                | 1.42631  | 2.44901  | -0.42322 | C                                     | 1.71474  | 2.51771  | -0.31648 |
| C                                      | 0.83523  | -1.06461 | 0.13770  | C                                | 0.85795  | 1.19990  | 0.00346  | C                                     | 1.08790  | 1.26504  | 0.03200  |
| H                                      | 3.25015  | -0.09140 | -0.42103 | H                                | 3.33227  | 0.04354  | 0.64902  | H                                     | 3.69996  | -0.20501 | 0.84991  |
| C                                      | -0.27402 | -0.41322 | 0.76608  | C                                | -0.37016 | 0.73587  | -0.56963 | C                                     | -0.21142 | 0.93143  | -0.48170 |
| C                                      | -0.66475 | -0.83154 | 2.01777  | C                                | -0.99577 | 1.53754  | -1.50050 | C                                     | -0.85531 | 1.86837  | -1.26711 |
| H                                      | -0.34324 | -2.16998 | 3.68684  | H                                | -0.97887 | 3.37175  | -2.63082 | H                                     | -0.79691 | 3.81161  | -2.18216 |
| C                                      | -0.00024 | -1.87413 | 2.70038  | C                                | -0.45123 | 2.77239  | -1.89509 | C                                     | -0.25688 | 3.10035  | -1.56394 |
| H                                      | 1.59587  | -3.30208 | 2.63837  | H                                | 1.17135  | 4.16642  | -1.70178 | H                                     | 1.46830  | 4.37438  | -1.37123 |
| C                                      | 1.07139  | -2.50227 | 2.12332  | C                                | 0.74469  | 3.22248  | -1.37737 | C                                     | 1.01321  | 3.42493  | -1.10813 |
| B                                      | 2.88018  | 2.14802  | -0.42853 | B                                | 2.91530  | -2.12559 | 0.03738  | B                                     | 2.29618  | -2.50641 | -0.00719 |
| F                                      | 2.95532  | 1.89820  | -1.74356 | F                                | 2.64620  | -2.15935 | 1.40456  | F                                     | 1.29081  | -2.55047 | 0.98416  |
| F                                      | 3.61970  | 0.58761  | 0.15171  | F                                | 3.86807  | -1.02531 | -0.15353 | F                                     | 3.52153  | -2.19602 | 0.61442  |
| F                                      | 3.74971  | 2.99758  | 0.11009  | F                                | 3.48121  | -3.27697 | -0.42578 | F                                     | 2.37119  | -3.69658 | -0.69100 |
| F                                      | 1.67078  | 2.03123  | 0.13967  | F                                | 1.76117  | -1.76734 | -0.66063 | F                                     | 1.97757  | -1.44030 | -0.88655 |



| 42                                 |          |          |          | 42                           |          |          |          | 42                                |          |          |          |
|------------------------------------|----------|----------|----------|------------------------------|----------|----------|----------|-----------------------------------|----------|----------|----------|
| <b>2nd EA reactant (pathway B)</b> |          |          |          | <b>2nd EA TS (pathway B)</b> |          |          |          | <b>2nd EA product (pathway B)</b> |          |          |          |
| H                                  | 3.39059  | -1.16896 | 3.37987  | H                            | -2.60715 | -1.28226 | 3.12618  | H                                 | 2.87593  | 1.72708  | -1.96735 |
| C                                  | 2.71453  | -1.90252 | -1.19881 | C                            | -2.33268 | 2.30121  | 0.09224  | C                                 | -0.84362 | 3.92337  | -0.17241 |
| H                                  | 2.86350  | -0.95607 | -1.74145 | H                            | -2.59406 | 1.85692  | -0.88011 | H                                 | -0.20529 | 4.54977  | 0.46538  |
| C                                  | 1.67376  | -2.72074 | -1.92227 | C                            | -1.32780 | 3.41461  | -0.09513 | C                                 | -2.15527 | 3.68396  | 0.51617  |
| H                                  | 1.99561  | -3.50113 | -2.60581 | H                            | -1.67209 | 4.44413  | -0.07550 | H                                 | -2.78445 | 4.55513  | 0.67690  |
| C                                  | 0.38293  | -2.46162 | -1.73372 | C                            | -0.04144 | 3.11804  | -0.27554 | C                                 | -2.55484 | 2.49429  | 0.95484  |
| H                                  | -0.39600 | -3.00085 | -2.26551 | H                            | 0.71499  | 3.88493  | -0.40481 | H                                 | -3.49570 | 2.40475  | 1.48956  |
| C                                  | 0.00119  | -1.30123 | -0.83380 | C                            | 0.32558  | 1.65141  | -0.32971 | C                                 | -1.73277 | 1.24103  | 0.82386  |
| H                                  | 0.26896  | -0.39799 | -1.39525 | H                            | -0.18674 | 1.24761  | -1.22007 | H                                 | -1.25144 | 1.05624  | 1.80517  |
| C                                  | 0.89832  | -1.27985 | 0.40821  | C                            | -0.38605 | 0.92905  | 0.81657  | C                                 | -0.56190 | 1.41149  | -0.11480 |
| C                                  | 2.25402  | -1.56316 | 0.19889  | C                            | -1.74735 | 1.19271  | 0.93476  | C                                 | -0.11373 | 2.64645  | -0.51152 |
| H                                  | 4.18891  | -1.74103 | 1.10134  | H                            | -3.59614 | 0.56177  | 1.80158  | H                                 | 1.46064  | 3.69688  | -1.52464 |
| C                                  | 3.13756  | -1.52455 | 1.27228  | C                            | -2.52535 | 0.38694  | 1.76081  | C                                 | 1.10863  | 2.71233  | -1.22000 |
| C                                  | 2.68968  | -1.20415 | 2.55179  | C                            | -1.96886 | -0.66783 | 2.50095  | C                                 | 1.90510  | 1.60710  | -1.50552 |
| H                                  | 0.98109  | -0.68984 | 3.75523  | H                            | -0.14909 | -1.64384 | 3.07599  | H                                 | 2.05278  | -0.52335 | -1.37749 |
| C                                  | 1.34330  | -0.93261 | 2.76105  | C                            | -0.61277 | -0.88734 | 2.44963  | C                                 | 1.46456  | 0.35560  | -1.13446 |
| C                                  | 0.44948  | -0.97427 | 1.69166  | C                            | 0.21077  | -0.10530 | 1.59729  | C                                 | 0.13064  | 0.17830  | -0.55953 |
| H                                  | 3.68059  | -2.41383 | -1.17243 | H                            | -3.26242 | 2.66580  | 0.53655  | H                                 | -0.99915 | 4.50330  | -1.09161 |
| H                                  | -1.79957 | -3.33778 | -0.52413 | H                            | 2.72052  | 3.15578  | -0.63110 | H                                 | -4.48548 | 0.79407  | 0.46834  |
| C                                  | -1.33414 | 1.21392  | -0.23277 | C                            | 0.84986  | -1.03154 | -0.17395 | C                                 | -0.20414 | -1.01839 | 0.38588  |
| H                                  | -0.27169 | 1.21699  | -0.47054 | H                            | -0.06468 | -0.80288 | -0.70925 | H                                 | 0.05033  | -0.63766 | 1.38061  |
| C                                  | -1.90961 | 2.51314  | 0.09267  | C                            | 1.06241  | -2.49553 | 0.01255  | C                                 | 0.59928  | -2.31866 | 0.19643  |
| H                                  | -1.29006 | 2.91877  | 0.91651  | H                            | 0.29460  | -2.92475 | 0.66106  | H                                 | 1.56787  | -2.13074 | -0.26895 |
| C                                  | -3.35335 | 2.54672  | 0.39412  | C                            | 2.45652  | -2.90177 | 0.35862  | C                                 | -0.12774 | -3.43323 | -0.49826 |
| H                                  | -3.80956 | 3.50575  | 0.61753  | H                            | 2.61827  | -3.91936 | 0.70062  | H                                 | 0.47554  | -4.26553 | -0.85141 |
| C                                  | -4.08281 | 1.41457  | 0.40283  | C                            | 3.49249  | -2.07059 | 0.17789  | C                                 | -1.45647 | -3.47352 | -0.61892 |
| H                                  | -5.14319 | 1.43078  | 0.63510  | H                            | 4.51022  | -2.39905 | 0.36998  | H                                 | -1.95116 | -4.32547 | -1.07833 |
| C                                  | -3.47715 | 0.13368  | 0.12370  | C                            | 3.30085  | -0.67566 | -0.21170 | C                                 | -2.30338 | -2.35529 | -0.18932 |
| C                                  | -2.07994 | 0.04747  | -0.22258 | C                            | 1.99747  | -0.15735 | -0.34293 | C                                 | -1.71005 | -1.17398 | 0.27504  |
| H                                  | -1.61528 | 3.21972  | -0.70371 | H                            | 0.81320  | -2.91195 | -0.98180 | H                                 | 0.86722  | -2.68000 | 1.19838  |
| C                                  | -1.46345 | -1.22968 | -0.49000 | C                            | 1.77081  | 1.23583  | -0.43664 | C                                 | -2.49154 | -0.03272 | 0.48290  |
| C                                  | -2.24060 | -2.35913 | -0.36642 | C                            | 2.85902  | 2.08305  | -0.55030 | C                                 | -3.87454 | -0.08987 | 0.32029  |
| H                                  | -4.18995 | -3.17527 | 0.04326  | H                            | 5.00417  | 2.23011  | -0.65775 | H                                 | -5.55296 | -1.33798 | -0.17666 |
| C                                  | -3.60629 | -2.26249 | -0.03425 | C                            | 4.15958  | 1.55663  | -0.54980 | C                                 | -4.47504 | -1.28848 | -0.05882 |
| H                                  | -5.27792 | -1.00105 | 0.45244  | H                            | 5.39640  | -0.18364 | -0.29415 | H                                 | -4.15762 | -3.32570 | -0.67454 |
| C                                  | -4.22404 | -1.04512 | 0.19796  | C                            | 4.38326  | 0.20187  | -0.36091 | C                                 | -3.69443 | -2.40595 | -0.32697 |
| B                                  | 1.99006  | 2.43137  | -0.48680 | B                            | -2.57758 | -1.14558 | -1.23692 | B                                 | 3.79558  | -0.48834 | 0.52011  |
| F                                  | 0.80104  | 3.04461  | -0.01041 | F                            | -1.85706 | -1.87435 | -0.26610 | F                                 | 3.64905  | -1.54710 | -0.40461 |
| F                                  | 1.59710  | 1.26141  | -1.20097 | F                            | -1.68677 | -0.18164 | -1.79087 | F                                 | 2.50347  | -0.19534 | 1.04301  |
| F                                  | 2.63775  | 3.29670  | -1.35182 | F                            | -3.02343 | -1.99087 | -2.23641 | F                                 | 4.64499  | -0.84655 | 1.54519  |
| F                                  | 2.79023  | 2.07053  | 0.58207  | F                            | -3.64066 | -0.47087 | -0.63363 | F                                 | 4.25841  | 0.63962  | -0.16368 |
| H                                  | -0.60171 | -0.77462 | 1.87849  | H                            | 1.26122  | -0.06254 | 1.86209  | H                                 | -0.40084 | -0.05795 | -1.52253 |

**2nd EA product (pathway B)**

|   |          |          |          |
|---|----------|----------|----------|
| H | -3.66307 | 0.18460  | -1.70918 |
| C | -1.18430 | 3.65989  | 0.14428  |
| H | -1.60973 | 4.41727  | -0.52893 |
| C | 0.21055  | 4.05832  | 0.52036  |
| H | 0.32423  | 5.02154  | 1.01189  |
| C | 1.28709  | 3.31984  | 0.26916  |
| H | 2.26989  | 3.69783  | 0.53904  |
| C | 1.25139  | 1.99732  | -0.44197 |
| H | 1.75035  | 2.14627  | -1.41750 |
| C | -0.15005 | 1.51983  | -0.75733 |
| C | -1.28013 | 2.30277  | -0.51202 |
| H | -3.42096 | 2.41516  | -0.65609 |
| C | -2.54151 | 1.81082  | -0.86363 |
| C | -2.67994 | 0.56496  | -1.45408 |
| H | -1.67894 | -1.21302 | -2.10970 |
| C | -1.55155 | -0.22608 | -1.68097 |
| C | -0.27837 | 0.23538  | -1.32638 |
| H | -1.82671 | 3.67409  | 1.03521  |
| H | 2.94443  | 2.05535  | 1.79071  |
| C | 0.97472  | -0.61701 | -1.50451 |
| H | 1.48399  | -0.26354 | -2.41832 |
| C | 0.63145  | -2.10482 | -1.69420 |
| H | -0.15389 | -2.38916 | -0.97735 |
| C | 1.80315  | -3.02258 | -1.48045 |
| H | 1.79979  | -3.98233 | -1.98947 |
| C | 2.77194  | -2.71352 | -0.61679 |
| H | 3.58369  | -3.40643 | -0.40941 |
| C | 2.78013  | -1.42688 | 0.09057  |
| C | 1.93818  | -0.39167 | -0.34551 |
| H | 0.20565  | -2.25932 | -2.69035 |
| C | 2.03815  | 0.87789  | 0.22838  |
| C | 2.89223  | 1.08291  | 1.31287  |
| H | 4.34979  | 0.20741  | 2.62842  |
| C | 3.68671  | 0.04175  | 1.78490  |
| H | 4.29794  | -2.00329 | 1.49712  |
| C | 3.65071  | -1.19815 | 1.15926  |
| B | -2.80999 | -1.80123 | 1.18513  |
| F | -1.45937 | -0.58513 | 1.29334  |
| F | -2.31558 | -2.53904 | 0.17635  |
| F | -2.72627 | -2.29327 | 2.41962  |
| F | -3.82406 | -0.98014 | 0.89755  |
| H | -1.18215 | -0.34389 | 0.40492  |
